# Supplementary material for: Appendicular skeleton ofProtoceratops andrewsi(Dinosauria, Ornithischia): comparative morphology, ontogenetic changes, and the implications for non-ceratopsid ceratopsian locomotion
Source: PeerJ journal article supplement (doi:10.7717/peerj.7324), 2019-07-22
Supplement: Supplemental_File_S2.pdf [file Supplemental_File_S2.pdf]

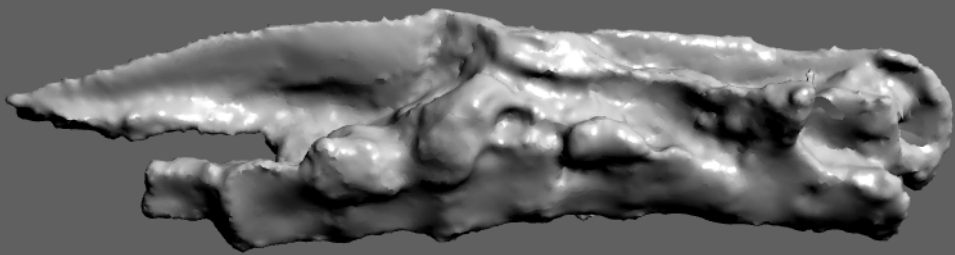

Interactive 3D model of the ilium and sacrum of *Protoceratops anrewsi* ZPAL MgD-II/3
